# Supplementary material for: Adventitial Progenitor Cells of Human Great Saphenous Vein Enhance the Resolution of Venous Thrombosis via Neovascularization
Source: Hindawi journal article supplement (doi:10.1155/2021/8816763), 2021-02-22

Figure II.

Shiying et al.

A

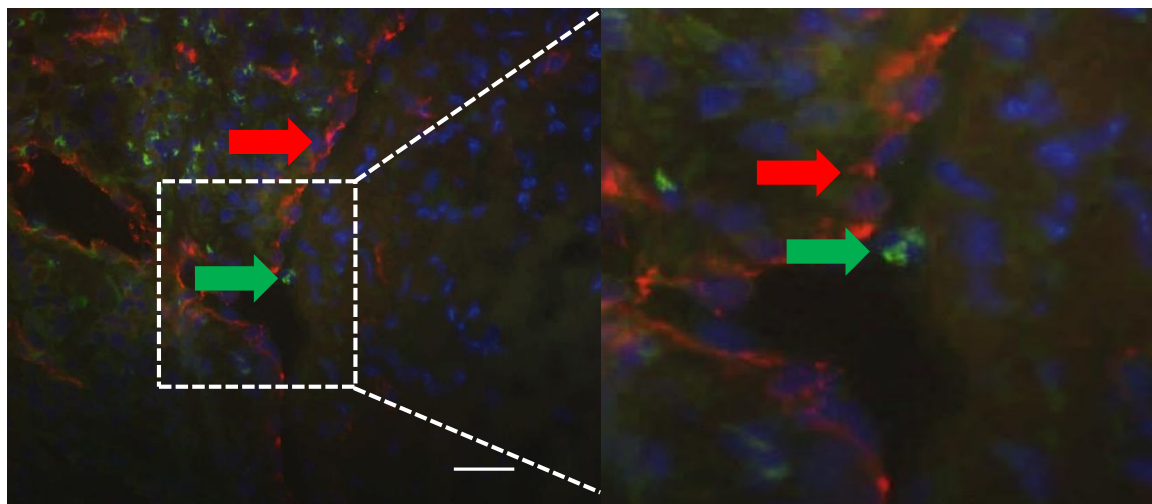

B

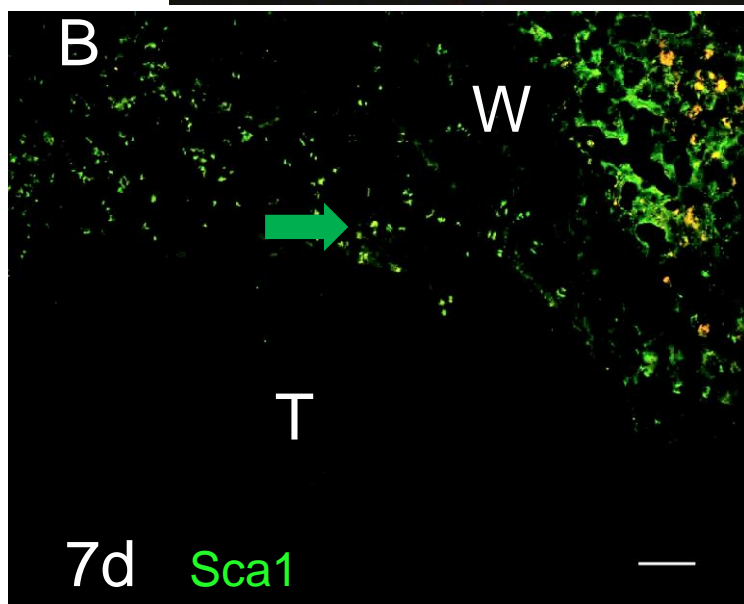

C

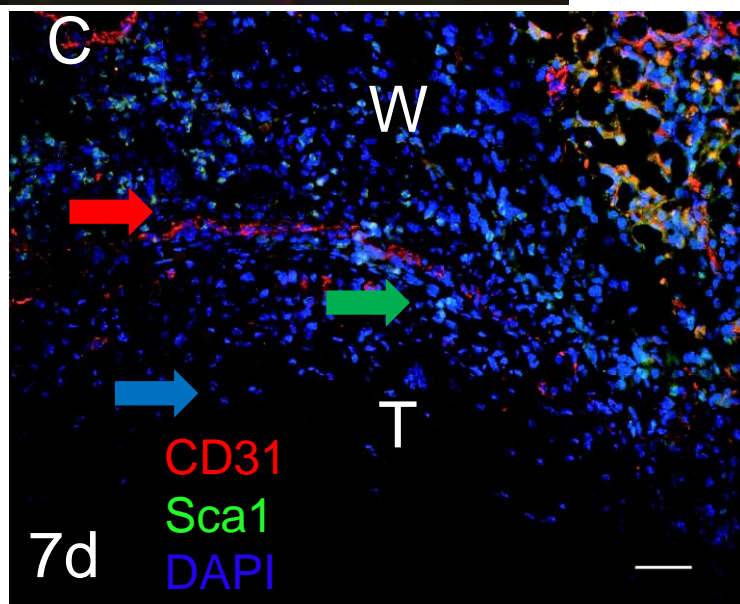

D

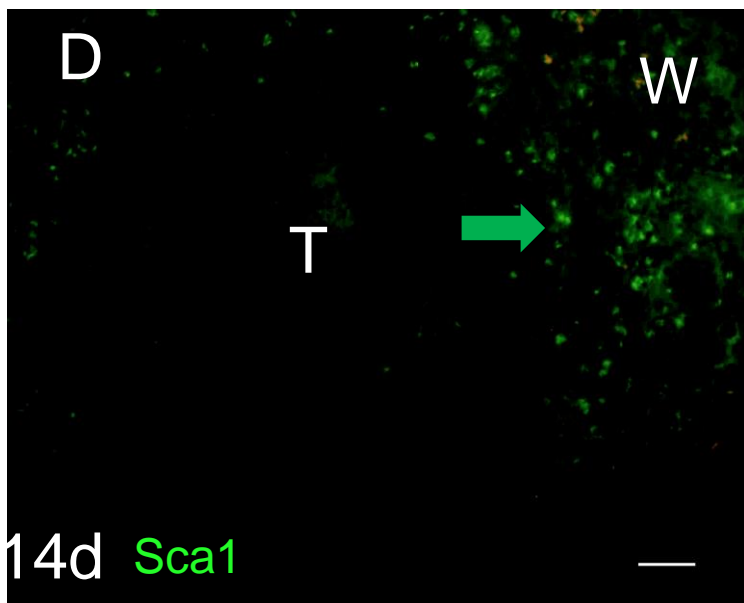

E

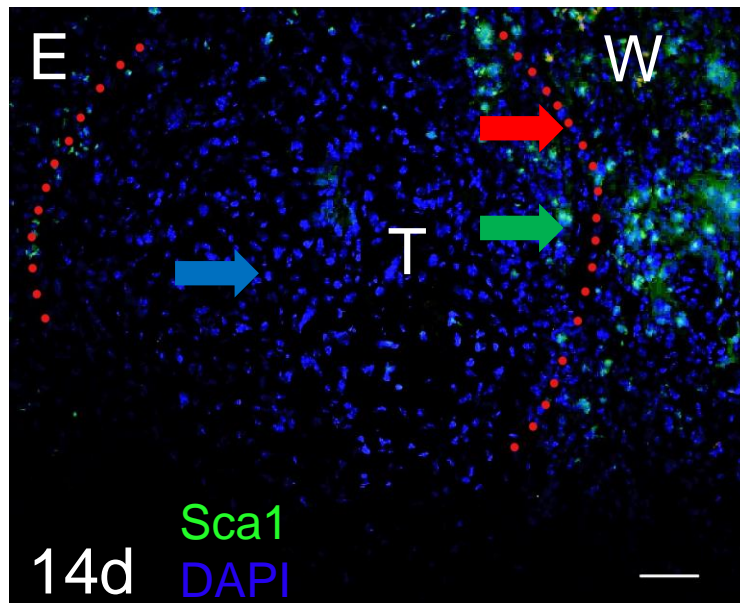

Supplement: f2 [file 8816763.f2.pdf]
