# Supplementary material for: Adventitial Progenitor Cells of Human Great Saphenous Vein Enhance the Resolution of Venous Thrombosis via Neovascularization
Source: Hindawi journal article supplement (doi:10.1155/2021/8816763), 2021-02-22

Figure III.

Shiying et al.

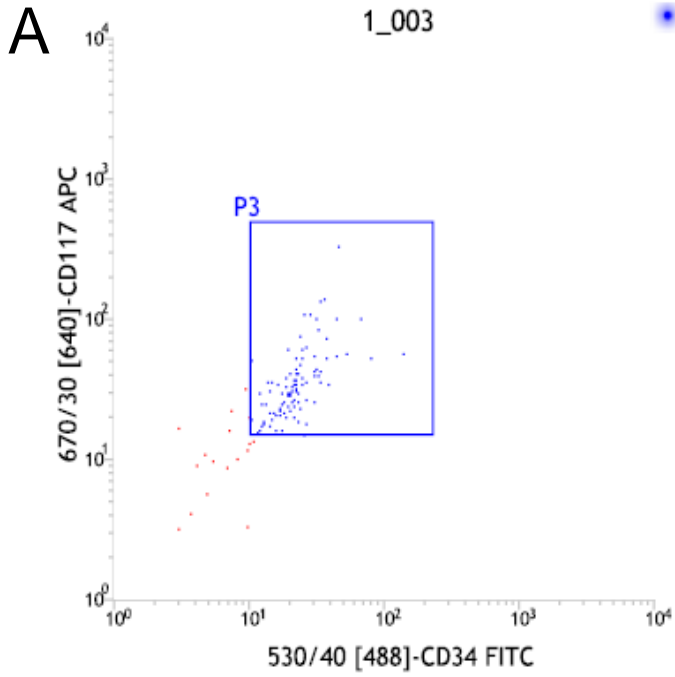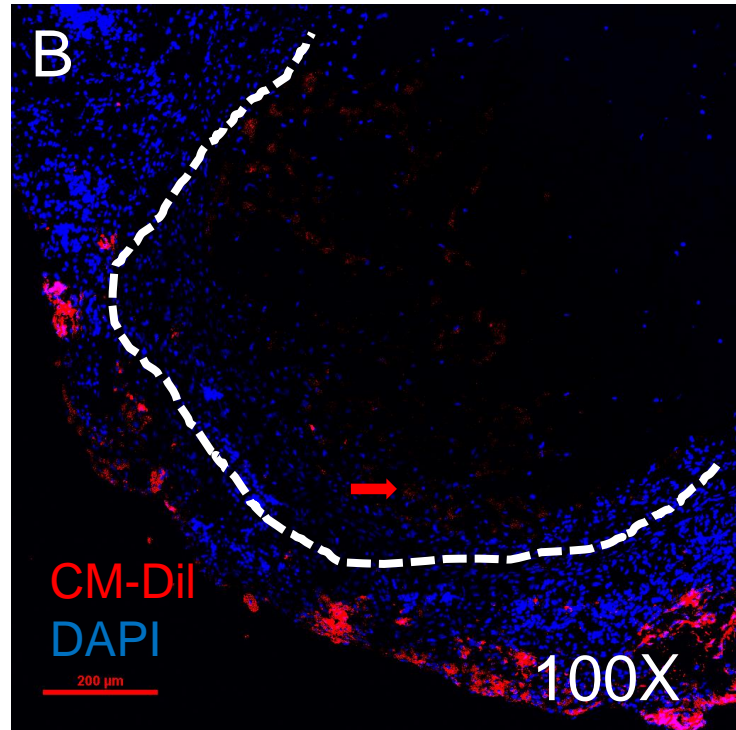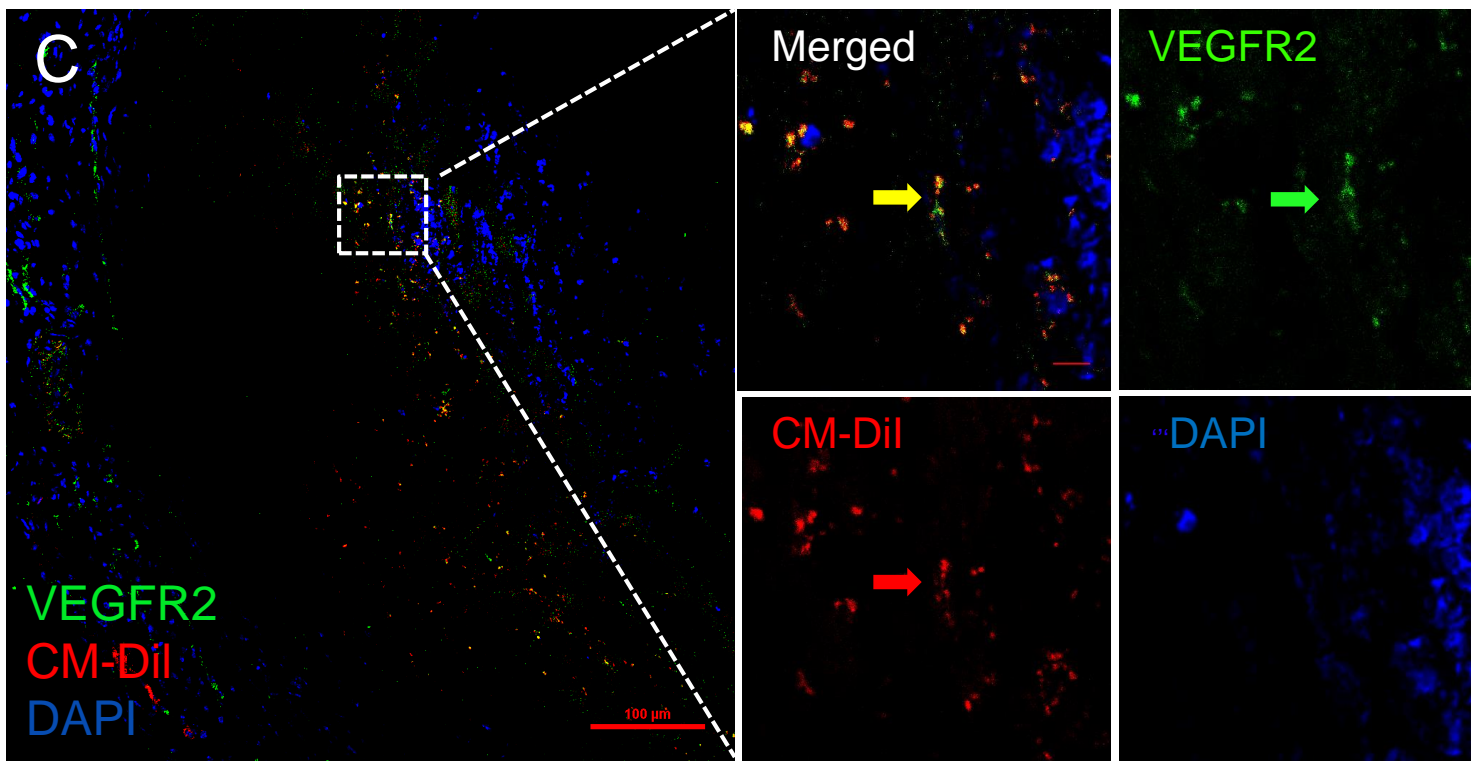

Supplement: f3 [file 8816763.f3.pdf]
